# Supplementary material
Source: PubMed Central journal article supplement (PMC5820698)
Supplement: jama-e1718956-s001.pdf [file jama-e1718956-s001.pdf]

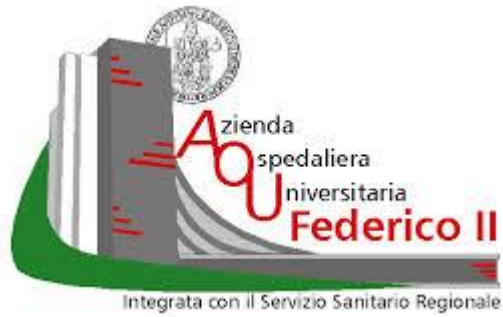

1

2

### 3 **STUDY PROTOCOL**

#### 4 **Cervical Pessary for Prevention of Spontaneous Preterm Birth in Singleton Pregnancies** 5 **without prior preterm birth and with short cervix: a randomized controlled trial**

6

7

8

9

10

11

12

13

14

15 **Abbreviation:** TVU, transvaginal ultrasound; CL, cervical length; PTB, preterm birth; SPTB,  
16 spontaneous preterm birth; OR, odds ratio; CI, confidence interval; GA, gestational age; RCT,  
17 randomized controlled trials; GCP, Good Clinical Practice; SD, standard deviation

18

19

20

21

22

23

24

25

26

27

28

29

30

31

32

33 **SUMMARY**

|                           |                                                                                                                                                                                                                                                                             |
|---------------------------|-----------------------------------------------------------------------------------------------------------------------------------------------------------------------------------------------------------------------------------------------------------------------------|
| <b>Title</b>              | Cervical Pessary for Prevention of Spontaneous Preterm Birth in Singleton Pregnancies without prior preterm birth and with short cervix: a randomized controlled trial.                                                                                                     |
| <b>Study location</b>     | University of Naples Federico II                                                                                                                                                                                                                                            |
| <b>Objective</b>          | To test the hypothesis that in asymptomatic singleton pregnancies without prior SPTB but with short TVU CL the insertion of a cervical pessary would reduce the rate of SPTB <34 weeks                                                                                      |
| <b>Study design</b>       | Single center prospective randomized trial                                                                                                                                                                                                                                  |
| <b>Study population</b>   | Asymptomatic singleton gestations without prior SPTB and with TVU CL $\leq 25$ mm                                                                                                                                                                                           |
| <b>Exclusion criteria</b> | <ul style="list-style-type: none"> <li>- Multiple gestations</li> <li>- Prior SPTB</li> <li>- Rupture membranes, cerclage or pessary, or vaginal bleeding at the time of randomization</li> <li>- Major fetal abnormalities</li> <li>- Chromosomal abnormalities</li> </ul> |

|                                              |                                                    |
|----------------------------------------------|----------------------------------------------------|
|                                              |                                                    |
| <b>GA at randomization</b>                   | 18 0/7 – 23 6/7                                    |
| <b>Duration of study period</b>              | 2 years (1 year enrollment + 1 year data analysis) |
| <b>Estimated study period for enrollment</b> | October 2016 – October 2017                        |
| <b>Estimated sample size</b>                 | 300 singleton pregnancies                          |
| <b>Primary outcome</b>                       | SPTB <34 weeks                                     |

34

35

36

37

38

39

40

41

42

43

44

45

**46 INTRODUCTION**

47 Preterm birth (PTB) is a major cause of perinatal morbidity and mortality. Worldwide, about 15  
48 million babies are born too soon every year, causing 1.1 million deaths, as well as short- and  
49 long-term disability in countless survivors.

50 Different strategies have been studied for prevention of spontaneous PTB (SPTB) in randomized  
51 controlled trials (RCTs), including progesterone, cerclage, cervical pessary, as well as lifestyle  
52 modification, such as smoking cessation, diet, aerobic exercise, and nutritional supplements.

53 Most successful effort to reduce the incidence of SPTB have focused on women with risk  
54 factors, such as prior SPTB. However, most SPTB occur in women who have no such history.

55 The evidence supports the use of vaginal progesterone in singleton gestations without prior  
56 SPTB but with short transvaginal ultrasound (TVU) cervical length (CL). Based on this  
57 evidence, universal TVU CL has been proposed for all singleton gestations without prior SPTB  
58 as a screening method for SPTB.

59 The cervical pessary is a silicone device that has been used to prevent SPTB. The leading  
60 hypotheses for its mechanisms are two: that the pessary helps to keep the cervix closed, and that  
61 the pessary changes the inclination of the cervical canal so that the pregnancy weight is not  
62 directly above the internal os.

63

64

65

66

67 **STUDY OBJECTIVES**

68 Thus, we aim to test the hypothesis that in asymptomatic singleton pregnancies without prior  
69 SPTB but with short TVU CL the insertion of a cervical pessary would reduce the rate of SPTB  
70 <34 weeks.

71

72

73

74

75

76

77

78

79

80

81

82

83

84

**85 METHODS****86 STUDY DESIGN**

87 The trial will be conducted in compliance with the protocol, Good Clinical Practice (GCP), and  
88 applicable regulatory requirements.

89 This will be a prospective, single center randomized trial of asymptomatic singleton pregnancies  
90 without prior SPTB but with short TVU CL who will be randomized to either pessary (i.e.  
91 intervention group) or no pessary (i.e. control group) at Division of High Risk Pregnancy,  
92 Departement of Obstetrics and Gynecology, University of Naples Federico II (Napoli, Italy)

**93 INCLUSION AND EXCLUSION CRITERIA**

94 Eligible women will be those referred to our Insitution due to a diagnosis of short cervix during  
95 the routine anatomy scan. In our Division, the measurement of the cervix by using TVU will be  
96 repeat and those found to have TVU CL  $\leq 25$ mm will be approached by the research staff and  
97 consented. An information leaflet concerning the study will be given to the women.

98 *Inclusion criteria are:*

- 99 - Singleton gestations
- 100 - No prior SPTB
- 101 - 18-50 years of age
- 102 - TVU CL  $\leq 25$ mm

103 *Exclusion criteria are:*

- 104 - Multiple gestations

- 105 - History of SPTB in a prior pregnancy
- 106 - Rupture of membranes at the time of randomization
- 107 - Known major fetal structural (i.e. defined as those that are lethal or require prenatal or
- 108 postnatal surgery) or chromosomal abnormality
- 109 - Fetal death at the time of randomization
- 110 - Cerclage in situ at the time of randomization
- 111 - Pessary in situ at the time of randomization
- 112 - Vaginal bleeding at the time of randomization
- 113 - Women who are unconscious, severely ill, mentally handicapped, or under the age of 18
- 114 years.
- 115 - Placenta previa and/or accreta
- 116 - Ballooning of membranes outside the cervix into the vaginal or TVU CL = 0mm
- 117 - Painful and regular uterine contractions

118 We define prior SPTB as history of spontaneous preterm delivery between 16 0/7 and 36 6/7  
119 weeks in a prior pregnancy.

120 Gestational age will be judged from the menstrual history and confirmed by measurement of  
121 fetal crown-rump length at a first trimester scan or the head circumference at the anatomy scan.

## 122 **QUALITY CONTROL AND HANDLING OF DATA**

123 Information of the characteristics of the patients, including demographic data, measurements for  
124 calculation of the BMI, and obstetrical and medical histories, will be obtained from the patients  
125 at the time of the TVU CL scan and will be recorded directly on the CRFs. These will then be  
126 entered into a computer database and on the subject screening log in the study site file.



127 Data on pregnancy outcomes were obtained from hospital maternity records. In case of PTB,  
128 records were examined to determine whether the delivery was medically indicated (indicated  
129 PTB) or spontaneous. SPTB included either spontaneous onset of labor or PPRM.

130 Quality control of screening, handling of data, and verification of adherence to protocols will be  
131 performed on a regular basis by the trial coordinators.

132 The operators who will perform the TVU CL scan will have received extensive training and  
133 passed a practical examination administered by an expert to demonstrate their competence in  
134 cervical assessment (Fetal Medicine Foundation Certificate of Competence in Cervical  
135 Assessment).

#### 136 **MEASUREMENT OF CERVICAL LENGTH**

137 Before the TVU CL scan, women will be asked to empty the bladder, undress from the waist  
138 down and to lie on an examination bed. The CL will be measured by operators with certification  
139 of competence in the technique (Fetal Medicine Foundation Certificate of Competence in  
140 Cervical Assessment). The length of the cervix will be measured with a transvaginal real-time  
141 ultrasound probe (GE Health Care Endocavity Transducer; bandwidth 5-13 MHz; Voluson E8)  
142 placed in the anterior fornix of the vaginal. Endocervical canal length will be measured as the  
143 distance between the internal and external os, by using a straight line with calipers placed at the  
144 notches made by the internal os and external os. The image will be enlarged while visualizing the  
145 three landmarks simultaneously. This procedure will be repeated three times. After a baseline CL  
146 will be measured, fundal pressure will be applied for 30 seconds as a provocative maneuver. CL  
147 will be measured during and after the fundal pressure. Only the shortest CL measurement will be  
148 recorded. Each examination will be performed during a minimum of five minutes.

**149 INTERVENTION GROUP AND CONTROL GROUP MANAGEMENT**

150 At the time of randomization, all women will undergo a speculum examination. Moreover,  
151 vaginal swabs will be taken from all women in both groups for bacteriological analysis. If the  
152 results will show infection, appropriate treatment will be given without delaying the insertion of  
153 the pessary in the study group. The pessary will be not removed in case of evidence of bacterial  
154 infection after device insertion.

155 All the cervical pessaries that will be used in the trial are certified by European Conformity  
156 (CE0482, MED/CERT ISO 9003/EN 46003; Dr Arabin, Witten, Germany).

157 All the pessaries will be inserted by the attendings, who had received practical training in the  
158 placement of the device. Pessary insertion training consists of a didactic session and a hands-on  
159 session. All staff will be required to demonstrate competence in pessary placement on a live  
160 model.

161 Women in the control group will receive the same obstetrical care as those in the study group.  
162 All the participants will be followed in outpatient settings every month until delivery. In the  
163 pessary group, a digital exam will be done at each of these monthly visits to assure proper  
164 pessary placement. At any follow-up visit, TVU CL and assessment of adverse events will be  
165 recorded. For TVU CL  $\leq 20$  mm, women in both groups will be all recommended vaginal  
166 progesterone 200mg suppositories daily until 36 6/7 weeks.

167 No bed rest or activity restriction will be recommended. Abstain from vaginal intercourse will  
168 also not recommended.

169 In the study group, the Arabin pessary will be placed at the time of randomization and will be  
170 removed during the 37th weeks (37 0/7 – 37 6/7) or early if clinically indicated. Reason for early  
171 removal includes active vaginal bleeding, preterm labor with persistent contractions and  
172 advanced dilatation despite tocolysis, severe discomfort, or subject request.

### 173 **RANDOMIZATION AND MASKING**

174 After written informed consented will be obtained from the eligible participants, women will be  
175 randomly allocated in a 1:1 ratio to either the pessary group or control group. Women were  
176 randomized by a web-based system (randomization.com) using random blocks of 2,4 and 6 to  
177 receive the pessary or no pessary. Randomization will be stratified by CL (CL  $\leq$ 20mm, CL  
178  $>$ 20mm – 25mm).

179 The randomization sequence will be prepared by an independent statistician (at Division of  
180 Statistics, Department of Law, Economics, Management and Quantitative Methods, University of  
181 Sannio, Benevento, Italy) and implemented by use of central telephone. The recruiters or the trial  
182 coordinator will not have access to the randomization sequence. The allocation code will not be  
183 disclosed after the patient's initials are confirmed. The study will be open label because of the  
184 nature of the intervention, but the outcome assessors, data collectors, and data analysts will  
185 blinded to the allocated treatment group.

### 186 **PRIMARY AND SECONDARY OUTCOMES**

187 The primary outcome is SPTB  $<$ 34 weeks

188 The secondary outcomes are:

189 - SPTB  $<$ 37,  $<$ 32, and  $<$ 28 weeks

- 190 - Mean gestational age at delivery in weeks
- 191 - Mean latency in days (time from randomization to delivery)
- 192 - PPROM <34 weeks
- 193 - Mode of delivery
- 194 - Maternal side effects
- 195 - Chorioamnionitis (i.e. inflammation of the chorion and amnion by histopathological
- 196 assessment after delivery)
- 197 - Birth weight
- 198 - NICU
- 199 - Neonatal death (i.e. death of a live-born baby within the first 28days of life)
- 200 - Perinatal death (either fetal or neonatal mortality)
- 201 - A composite of adverse perinatal outcome defined as at least one of the following:
  - 202 ○ NEC
  - 203 ○ IVH grade 3 or higher
  - 204 ○ RDS
  - 205 ○ BPD
  - 206 ○ ROP requiring therapy
  - 207 ○ Blood-culture proven sepsis
  - 208 ○ Neonatal death.

## 209 **SAMPLE SIZE**

210 The sample size calculation presented here is based on detecting an effect that produces 50%  
211 reduction in the overall incidence of spontaneous preterm delivery between randomization and

212 33 6/7 weeks from an anticipated 25% in the control group (i.e. singletons with short cervix with  
213 vaginal progesterone).

214 On the assumption that 60% of women with singleton gestations fulfilling the entry criteria agree  
215 to participate in the study and provide follow-up data, we would be to approach about 500 such  
216 women for a final sample size of 300 women. The power calculations of 300 women (150 per  
217 group) were undertaken by computer simulation.

218 At our institution, we perform about 3,000 deliveries per year. However, our hospital is the one  
219 of the few referral center in the Regione Campania (an area of about 55,000 deliveries per year)  
220 for PTB and most of the women with short TVU CL at the routine anatomy scan are referred to  
221 our institution. Therefore, we perform about 600 counselling per year on the risk of PTB in  
222 singleton gestations with short cervix, of them about 500 are singleton gestations without prior  
223 SPTB. Based on these data, we estimate a 2-year study period, 1 year for enrollment and 1 year  
224 for data analysis.

## 225 **STATISTICAL ANALYSIS AND REPORTING**

226 Results will be presented according to the CONSORT statement.

### 227 ***Baseline data***

228 Baseline data on (LIST) for the intervention and control groups will be summarized for by the  
229 median and the interquartile range. Continuous data will be summarized in terms of mean, SD,  
230 minimum, maximum, and quartiles. Attribute data will be summarized on terms of frequency  
231 counts and proportions

### 232 ***Primary analysis***

233 The primary analysis will be an intention to treat comparison of the treatment assigned at  
234 randomization. The treatment effect will be tested at the two-tailed 5% level. A 95% CI will be  
235 produced the OR of intervention/control group. The incidence of SPTB <34 weeks will  
236 quantified by the OR with 95% CI using the logistic regression allowing for cervical length as a  
237 covariate

### 238 *Secondary analysis*

239 The risk of SPTB <34 will be assessed with the use of Kaplan-Meier analysis, in which  
240 gestational age is the time scale and spontaneous delivery the event, and elective deliveries will  
241 be treated as censored. Hazard ratios will be estimated.

242 Statistical analysis will be performed using Statistical Package for Social Sciences (SPSS) (IBM  
243 Inc., Armonk, NY, USA)

### 244 **REGULATORY ISSUES**

245 This study is approved by the local IRB at University of Naples Federico II (Comitato Etico  
246 Carlo Romano) (Unina trial #213/15)

### 247 **FUNDING**

248 No financial support will be received for this study

249

250

251

252 **REFERENCES**

253 Agha RA, Altman DG, Rosin D. The SPIRIT 2013 statement – defining standard protocol  
254 items for trials. *Int J Surg*, 2015; 13:288-91

255 Altman DG. *Practical statistics for medical research*. London: Chapman and Hall, 1991

256 Berghella V, Ludmir J, Simonazzi G, Owen J. Transvaginal cervical cerclage: evidence for  
257 perioperative management strategies. *Am J Obstet Gynecol*, 2013; 209:181-92

258 Berghella V, Odibo AO, To MS, Rust OA, Althuisius SM. Cerclage for short cervix on  
259 ultrasonography: meta-analysis of trials using individual patient-level data. *Obstet Gynecol*,  
260 2005; 106:181-9

261 Hamilton BE, Martin JA, Ventura SJ. Births: preliminary data for 2011. *Natl Vital Stat*  
262 *Rep*, 2012; 61:1-20

263 Khalifeh A, Berghella V. Universal cervical length screening in singleton gestations without  
264 a previous preterm birth: ten reasons why it should be implemented. *Am J Obstet Gynecol*,  
265 2015 Dec 19. Doi: 10.1016/j.ajog.2015.12.017

266 Miller ES, Grobman WA, Fonseca L, Robinson BK. Indomethacin and antibiotics in  
267 examination-indicated cerclage: a randomized controlled trial. *Obstet Gynecol*, 2014;  
268 123:1311-6

269 Roman et al. Cerclage in twin pregnancy with dilated cervix between 16 to 24 weeks of  
270 gestation: retrospective cohort study. *Am J Obstet Gynecol*. 2016 Jul;215(1):98.e1-98.e11.  
271 doi: 10.1016/j.ajog.2016.01.172. Epub 2016 Jan 28.

- 272 Roman et al. Efficacy of ultrasound-indicated cerclage in twin pregnancies. *Am J Obstet*  
273 *Gynecol.* 2015 Jun;212(6):788.e1-6. doi: 10.1016/j.ajog.2015.01.031.
- 274 Romero et al. Vaginal progesterone decreases preterm birth and neonatal morbidity and  
275 mortality in women with a twin gestation and a short cervix: An updated meta-analysis of  
276 individual patient data. *Ultrasound Obstet Gynecol.* 2017 Jan 9. doi: 10.1002/uog.17397.  
277 [Epub ahead of print]
- 278 Saccone G et al. Cerclage for short cervix in twin pregnancies: systematic review and meta-  
279 analysis of randomized trials using individual patient-level data. *Acta Obstet Gynecol Scand.*  
280 2015 Apr;94(4):352-8. doi: 10.1111/aogs.12600. Epub 2015 Mar 1.
- 281 Salomon LJ, Alfirevic Z, Berghella V et al. Practice guidelines for performance of the  
282 routine mid-trimester fetal ultrasound scan. *Ultrasound Obstet Gynecol*, 2011; 37:116-26
