# Supplementary material
Source: PubMed Central journal article supplement (PMC5820698)
Supplement: jama-e1718956-s002.pdf [file jama-e1718956-s002.pdf]

## Supplementary Online Content

1

2

3 Saccone G, Maruotti GM, Giudicepietro A, Martinelli P. Effect of cervical pessary on  
4 spontaneous preterm birth in women with singleton pregnancies and short cervical  
5 length: a randomized clinical trial. *JAMA*. doi:10.1001/jama.2017.18956

6

7 **eTable 1.** Results of Vaginal Swabs at Randomization

8 **eTable 2.** Post Hoc Secondary Outcomes

9 **eTable 3.** Subgroup Analyses for Spontaneous Preterm Birth at Less Than 34 Weeks

10

11 This supplementary material has been provided by the authors to give readers  
12 additional information about their work.

13

14

15 **eTable 1.** Results of Vaginal Swabs at Randomization  
 16

| <b>Vaginal swabs</b>                                | <b>Pessary group<br/>N=150</b> |                                 | <b>Control group<br/>N=150</b> |                                 |
|-----------------------------------------------------|--------------------------------|---------------------------------|--------------------------------|---------------------------------|
| <b>Positive vaginal swab at randomization n (%)</b> | 36 (24.0%)                     |                                 | 41 (27.3%)                     |                                 |
| <b>Antibiotics for positive vaginal swab n (%)</b>  | 33 (22.0%)                     |                                 | 38 (25.3%)                     |                                 |
| <b>Abnormal results</b>                             | <b>n</b>                       | <b>Antibiotic therapy<br/>n</b> | <b>n</b>                       | <b>Antibiotic therapy<br/>n</b> |
| Bacterial vaginosis                                 | 30                             | 30                              | 34                             | 34                              |
| Candida                                             | 3                              | 0                               | 3                              | 0                               |
| Escherichia coli                                    | 1                              | 1                               | 2                              | 2                               |
| Ureoplasma                                          | 1                              | 1                               | 1                              | 1                               |
| Group B streptococcus                               | 1                              | 1                               | 1                              | 1                               |

17  
 18 *Data are presented as number (percentage).*  
 19

20 **eTable 2.** Post Hoc Secondary Outcomes  
 21

|                                                             | <b>Pessary group<br/>N=150</b> | <b>Control group<br/>N=150</b> | <b>Between group<br/>difference in %<br/>(95% CI)</b> | <b>RR (95% CI)</b>         | <b><i>p</i>-value***</b> |
|-------------------------------------------------------------|--------------------------------|--------------------------------|-------------------------------------------------------|----------------------------|--------------------------|
| <b>Overall preterm birth<br/>&lt;37 weeks</b>               | 35 (23.3%)                     | 53 (35.3%)                     | <b>-12.0 (-22.5 to -1.2)</b>                          | <b>0.66 (0.46 to 0.95)</b> | <b>0.03</b>              |
| <b>Overall preterm birth<br/>&lt;34 weeks</b>               | 14 (9.3%)                      | 26 (17.3%)                     | <b>-8.0 (-16.1 to -0.1)</b>                           | <b>0.54 (0.29 to 0.99)</b> | <b>0.04</b>              |
| <b>Overall preterm birth<br/>&lt;32 weeks</b>               | 11 (7.3%)                      | 15 (10.0%)                     | -2.7 (-4.2 to +9.7)                                   | 0.73 (0.35 to 1.54)        | 0.54                     |
| <b>Overall preterm birth<br/>&lt;28 weeks</b>               | 7 (4.7%)                       | 9 (6.0%)                       | -1.3 (-4.4 to +7.1)                                   | 0.78 (0.30 to 2.03)        | 0.80                     |
| <b>Iatrogenic preterm<br/>birth &lt;34 weeks</b>            | 3 (2.0%)*                      | 3 (2.0%)**                     | 0 (-4.1 to +4.1)                                      | 1.00 (0.21 to 4.88)        | 1.00                     |
| <b>Birth weight &lt;2,500<br/>grams</b>                     | 28 (18.7%)                     | 45 (30.0%)                     | -11.3 (-1.1 to +21.2)                                 | <b>0.62 (0.41 to 0.94)</b> | <b>0.03</b>              |
| <b>Birth weight &lt;1,500<br/>grams</b>                     | 10 (6.7%)                      | 15 (10.0%)                     | -3.3 (-3.5 to +10.2)                                  | 0.67 (0.31 to 1.44)        | 0.40                     |
| <b>Necrotizing<br/>enterocolitis</b>                        | 3 (2.0%)                       | 4 (2.7%)                       | -0.7 (-3.5 to +5.0)                                   | 0.75 (0.17 to 3.29)        | 0.99                     |
| <b>Intraventricular<br/>hemorrhage grade 3<br/>or 4</b>     | 4 (2.7%)                       | 6 (4.0%)                       | -1.3 (-3.5 to +6.2)                                   | 0.67 (0.19 to 2.31)        | 0.75                     |
| <b>Respiratory distress<br/>syndrome</b>                    | 14 (9.3%)                      | 31 (20.7%)                     | <b>-11.4 (-19.9 to -2.9)</b>                          | <b>0.45 (0.25 to 0.81)</b> | <b>0.01</b>              |
| <b>Bronchopulmonary<br/>dysplasia</b>                       | 8 (5.3%)                       | 12 (8.0%)                      | -2.7 (-3.5 to +9.0)                                   | 0.67 (0.28 to 1.58)        | 0.49                     |
| <b>Retinopathy of<br/>prematurity<br/>requiring therapy</b> | 1 (0.7%)                       | 9 (6.0%)                       | <b>-5.3 (-10.4 to -0.9)</b>                           | <b>0.11 (0.01 to 0.87)</b> | <b>0.02</b>              |
| <b>Blood-culture proven<br/>sepsis</b>                      | 9 (6.0%)                       | 13 (8.7%)                      | -2.7 (-3.8 to +9.3)                                   | 0.69 (0.31 to 1.57)        | 0.50                     |

22  
 23 *Data are presented as number (percentage).*  
 24 *RR, relative risk; CI, confidence interval; Overall preterm birth, either spontaneous or indicated*  
 25 *preterm birth*  
 26 *No adjustment for multiple comparisons was made, so the findings of the secondary outcomes*  
 27 *should be considered exploratory.*  
 28 *Boldface data, statistically significant*  
 29 *\*One for nonreassuring fetal heart rate at nonstress test, and two for preeclampsia*  
 30 *\*\*One for intrauterine growth restriction, and two for preeclampsia*  
 31 *\*\*\* chi-square test with continuity correction*  
 32

33 **eTable 3.** Subgroup Analyses for Spontaneous Preterm Birth at Less Than 34 Weeks  
 34

|                                | <b>Pessary group</b> | <b>Control group</b> | <b>Between group difference % (95% CI)</b> | <b>RR (95% CI)</b>         | <b>p-value*</b> | <b>Test of interaction p-value**</b> |
|--------------------------------|----------------------|----------------------|--------------------------------------------|----------------------------|-----------------|--------------------------------------|
| <b>Progesterone therapy</b>    | 10/133 (7.5%)        | 21/125 (16.8%)       | <b>-9.3 (-17.7 to -1.0)</b>                | <b>0.45 (0.22 to 0.91)</b> | <b>0.04</b>     | 0.56                                 |
| <b>No progesterone therapy</b> | 1/17 (5.9%)          | 2/25 (8.0%)          | -2.1 (-21.8 to +21.0)                      | 0.74 (0.07 to 7.48)        | 0.99            |                                      |
| <b>TVU CL ≤10mm</b>            | 3/56 (5.4%)          | 10/42 (23.8%)        | <b>-18.4 (-34.6 to -3.3)</b>               | <b>0.23 (0.07 to 0.77)</b> | <b>0.02</b>     | 0.46                                 |
| <b>TVU CL &gt;10mm</b>         | 8/94 (8.5%)          | 13/108 (12.0%)       | -3.5 (-5.8 to +12.5)                       | 0.71 (0.31 to 1.63)        | 0.56            |                                      |

35  
 36 *Data are presented as number/total number (percentage).*

37 *Boldface data, statistically significant*

38 *SPTB, spontaneous preterm birth; RR, relative risk; CI, confidence interval; TVU CL,*  
 39 *transvaginal ultrasound cervical length*

40 *\* chi-square test with continuity correction*

41 *\*\*Wald test*

42

43

44
